# Supplementary material for: Characterization of ephedrine HCl and pseudoephedrine HCl using quadrupolar NMR crystallography guided crystal structure prediction
Source: Royal Society of Chemistry journal article supplement (doi:10.1039/d4fd00089g), 2024-06-24
Supplement: d4fd00089g1.pdf [file d4fd00089g1.pdf]

## Supporting Information for

### Characterization of Ephedrine HCl and Pseudoephedrine HCl Using Quadrupolar NMR Crystallography Guided Crystal Structure Prediction

Carl H. Fleischer III,<sup>1,2</sup> Sean T. Holmes,<sup>1,2</sup> Kirill Levin<sup>3</sup> Stanislav L. Veinberg<sup>3</sup> and Robert W. Schurko<sup>1,2\*</sup>

<sup>1</sup> Department of Chemistry & Biochemistry, Florida State University, Tallahassee, FL 32306

<sup>2</sup> National High Magnetic Field Laboratory, Tallahassee, FL, 32310

<sup>3</sup> Department of Chemistry & Biochemistry, University of Windsor, Windsor, ON, N9B 3P4

\* Author to whom correspondence should be addressed. E-mail: [rschurko@fsu.edu](mailto:rschurko@fsu.edu); Web:

<https://www.chem.fsu.edu/~schurko/>; Tel: 850-645-8614

#### Table of Contents:

| Title:                                                                                                                                                                                                                                                                                                                                               | Page # |
|------------------------------------------------------------------------------------------------------------------------------------------------------------------------------------------------------------------------------------------------------------------------------------------------------------------------------------------------------|--------|
| <b>Scheme S1.</b> QNMRX-CSP protocol flowchart.                                                                                                                                                                                                                                                                                                      | 2      |
| <b>Figure S1.</b> Simulated PXRD of the convergent geometry optimized crystal structures of Eph (EPHECL02; black) and Pse (PEPHCL; black) and the experimental PXRD patterns of (A; red) Eph, (B; blue) Pse, and (C; green) Sudafed.                                                                                                                 | 3      |
| <b>Figure S2.</b> <sup>1</sup> H→ <sup>15</sup> N CP/MAS NMR spectra of (A; red) Eph and (B; blue) Pse acquired at 9.4 T and $\nu_{\text{rot}} = 5$ kHz. The spectra feature single peaks corresponding to the nitrogen atoms in the charged secondary amine groups with $\delta_{\text{iso}}(^{15}\text{N}) = -331$ ppm (Eph) and $-335$ ppm (Pse). | 4      |
| <b>Figure S3.</b> Simulated PXRD of the DFT-D2* geometry optimized known crystal structure of Eph (EPHECL02; black) and structure 3-12 (A; blue), which failed structural validation based on poor agreement with simulated PXRD and CCDC thresholds.                                                                                                | 5      |
| <b>Figure S4.</b> Simulated PXRD of NaCl (black) and experimental (green) PXRD pattern of Sudafed.                                                                                                                                                                                                                                                   | 6      |
| <b>Figure S5.</b> Simulated PXRD patterns of the six candidate structures from $P2_12_12_1$ for Sudafed (A-F) and of the convergent geometry optimized known crystal structure of Pse (PEPHCL).                                                                                                                                                      | 7      |
| <b>Table S1.</b> Experimental details for the acquisition of <sup>1</sup> H→ <sup>13</sup> C and <sup>1</sup> H→ <sup>15</sup> N CP/MAS spectra.                                                                                                                                                                                                     | 8      |
| <b>Table S2.</b> Experimental details for the acquisition of <sup>35</sup> Cl{ <sup>1</sup> H} spectra.                                                                                                                                                                                                                                              | 9      |
| <b>Table S3.</b> Crystallographic information for Eph and Pse.                                                                                                                                                                                                                                                                                       | 10     |
| <b>Table S4.</b> Experimental <sup>13</sup> C isotropic chemical shifts.                                                                                                                                                                                                                                                                             | 11     |
| <b>Table S5.</b> Hirshfeld charges from the QNMRX-CSP charge database.                                                                                                                                                                                                                                                                               | 12     |
| <b>Table S6.</b> CSD datamine summary of the top seven space groups.                                                                                                                                                                                                                                                                                 | 13     |
| <b>Supplement 1: Charge Database.</b>                                                                                                                                                                                                                                                                                                                | 14     |
| <b>Supplement 2: Computational Workstations.</b>                                                                                                                                                                                                                                                                                                     | 14     |
| <b>References</b>                                                                                                                                                                                                                                                                                                                                    | 15     |

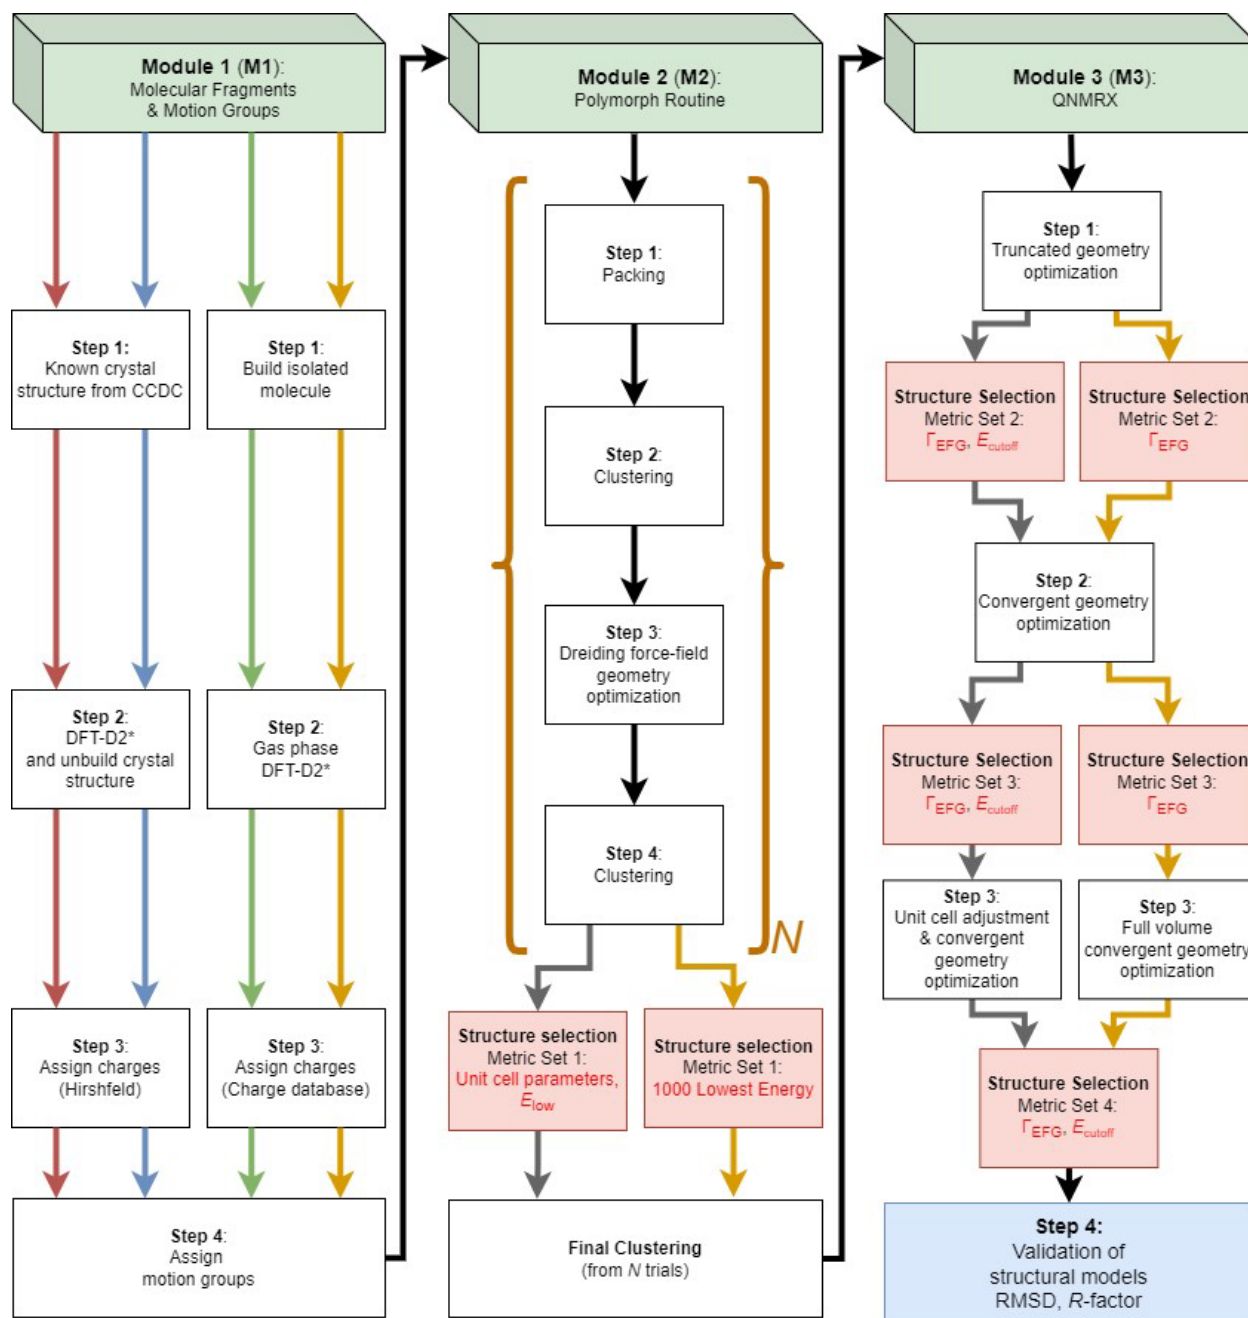

**Scheme S1.** QNMRX-CSP protocol flowchart. The red path indicates the benchmarking of the protocol starting from the known crystal structure (§3.2.1), the green path indicates the benchmarking of the protocol starting from a refined isolated molecule (§3.2.2), the blue path indicates the application §3.2.3, the yellow path indicates the application of §3.2.4. The grey path indicates the benchmarking and application of §3.2.1, §3.2.2, and §3.2.3 and the black path indicates the parts of the protocol that all sections were applied to. Each module is highlighted in a green box, each of the applied metrics are in a red box, and the structural validation is highlighted in a blue box.

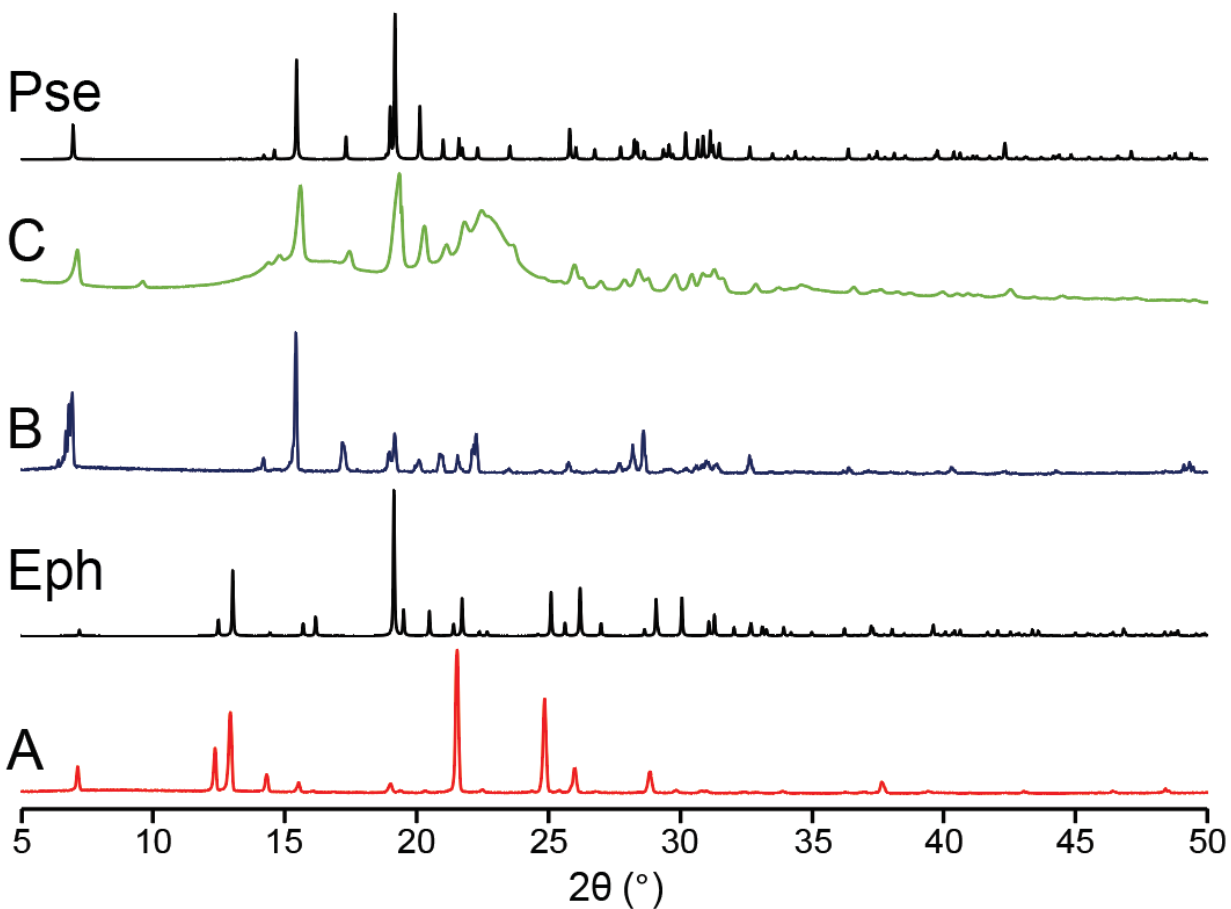

**Figure S1.** Simulated PXRD of the convergent geometry optimized crystal structures of Eph (Eph; black) and Pse (Pse; black) and the experimental PXRD patterns of (A; red) Eph, (B; blue) Pse, and (C; green) Sudafed. The experimental PXRD pattern of Pse features rough and spiky peaks *ca.* 7°. This roughness can be attributed to the sample not being fully grinded with a pestle prior to acquisition.

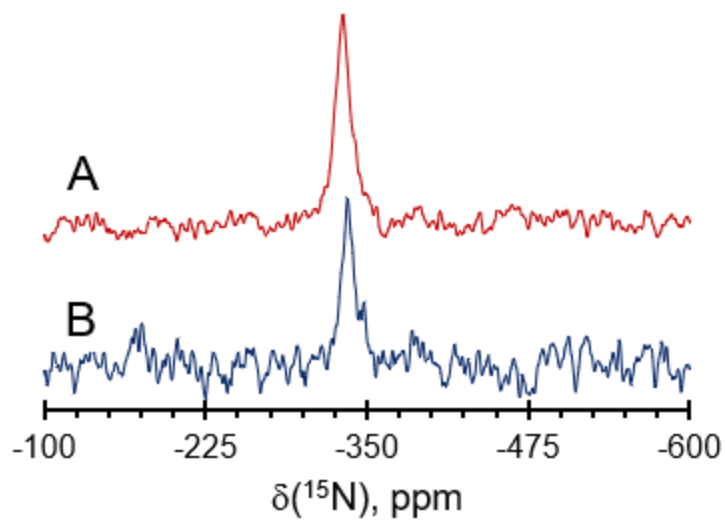

**Figure S2.**  $^1\text{H}\rightarrow^{15}\text{N}$  CP/MAS NMR spectra of (A; red) Eph and (B; blue) Pse acquired at 9.4 T and  $\nu_{\text{rot}} = 5$  kHz. The spectra feature single peaks corresponding to the nitrogen atoms in the charged secondary amine groups with  $\delta_{\text{iso}}(^{15}\text{N}) = -331(10)$  ppm (Eph) and  $-335(10)$  ppm (Pse).

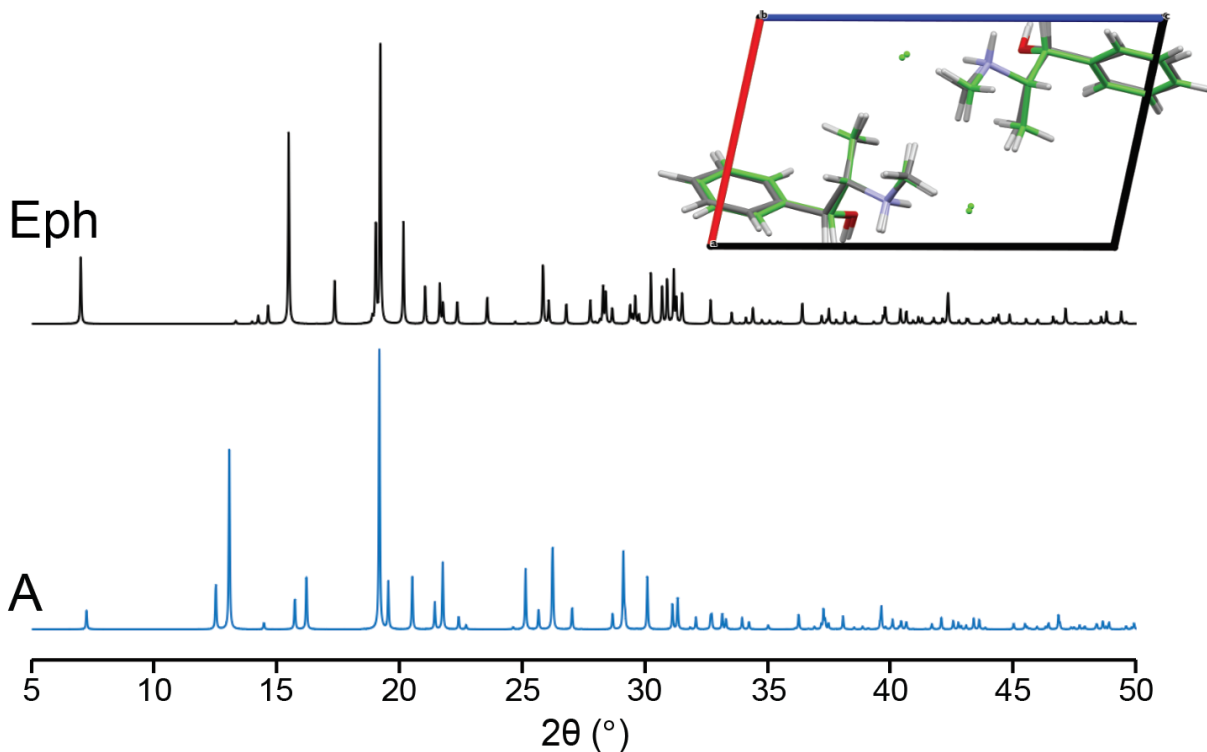

**Figure S3.** Simulated PXRD of the DFT-D2\* geometry optimized known crystal structure of Eph (Eph; black) and structure 3-12 (A; blue), which failed structural validation based on poor agreement with simulated PXRD and CCDC thresholds.

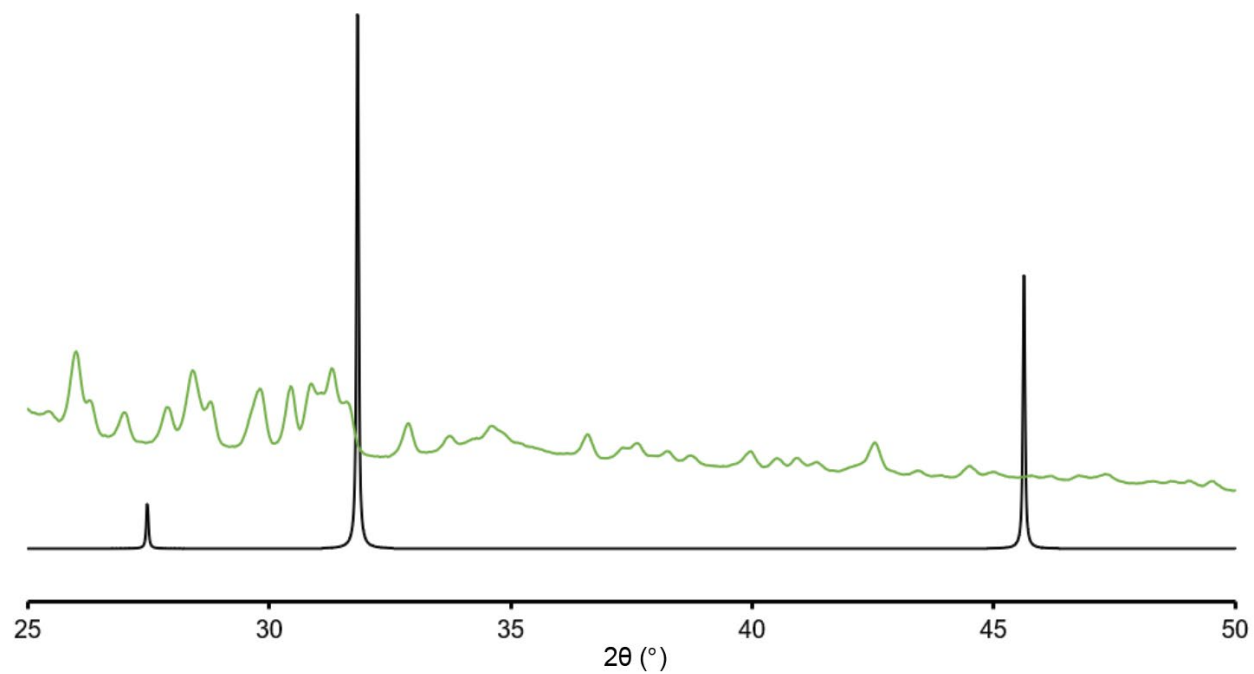

**Figure S4.** Simulated PXRD of NaCl (black) and experimental (green) PXRD pattern of Sudafed.

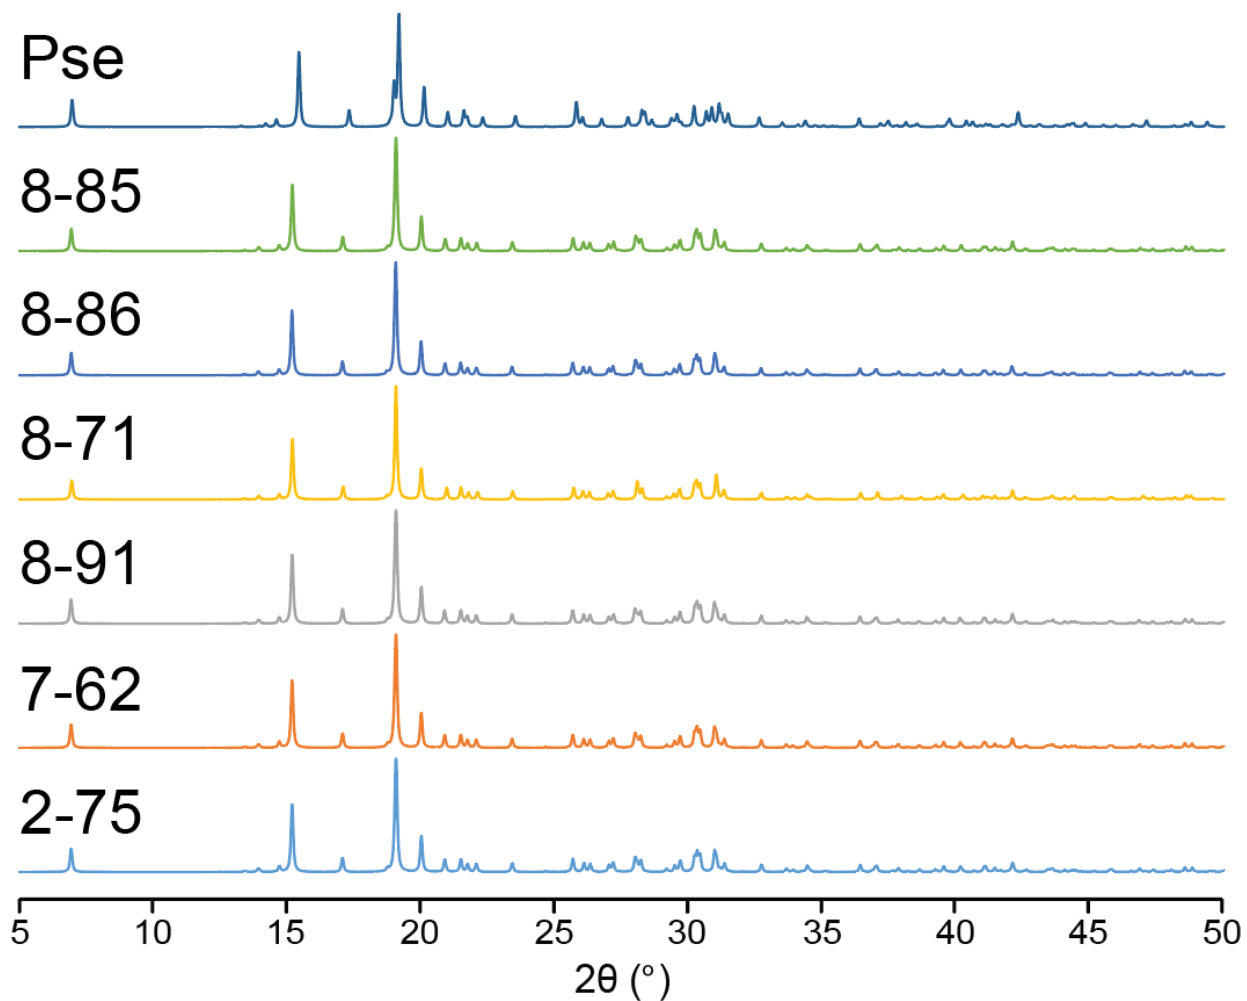

**Figure S5.** Simulated PXRD patterns of the six candidate structures from  $P2_12_12_1$  for Sudafed (Table 8), and of the convergent geometry optimized known crystal structure of Pse (Pse).

**Table S1.** Experimental details for the acquisition of  $^1\text{H}\rightarrow^{13}\text{C}$  and  $^1\text{H}\rightarrow^{15}\text{N}$  CP/MAS spectra.

|                                                    | $^{13}\text{C}$ CP/MAS |      |         | $^{15}\text{N}$ CP/MAS |       |
|----------------------------------------------------|------------------------|------|---------|------------------------|-------|
|                                                    | Eph                    | Pse  | Sudafed | Eph                    | Pse   |
| $B_0$ (T)                                          | 9.4                    |      | 14.1    | 9.4                    |       |
| Time domain size                                   | 2048                   |      | 4096    | 8144                   |       |
| Dwell time ( $\mu\text{s}$ )                       | 6.133                  |      | 3.589   | 6.133                  |       |
| Acquisition time (ms)                              | 12.5                   |      | 14.7    | 5.0                    |       |
| Spectral width (kHz)                               | 81.522                 |      | 138.889 | 81.522                 |       |
| Number of scans                                    | 288                    | 256  | 256     | 109861                 | 85646 |
| Recycle delay (s)                                  | 10.0                   | 12.5 | 18      | 2.0                    |       |
| Spinning rate (kHz)                                | 12.5                   |      | 12      | 5.0                    |       |
| $^1\text{H}$ Hartmann-Hahn matching field (kHz)    | 50                     |      | 50      | 80                     |       |
| Contact time (ms)                                  | 1.5                    |      | 1       | 2.0                    |       |
| $^1\text{H}$ $\pi/2$ pulse width ( $\mu\text{s}$ ) | 5.0                    |      | 2.5     | 5.0                    |       |
| $^1\text{H}$ SPINAL-64 decoupling field (kHz)      | 50                     |      | 100     | 30                     |       |
| Total experiment time (min)                        | 48                     | 53   | 77      | 3662                   | 2855  |



**Table S2.** Experimental details for the acquisition of  $^{35}\text{Cl}\{^1\text{H}\}$  spectra.

| Experiment                                         | 9.4, Static |       | 21.1 T, Static |       | 21.1 T, MAS |      | 18.8 T    |             |
|----------------------------------------------------|-------------|-------|----------------|-------|-------------|------|-----------|-------------|
|                                                    | Eph         | Pse   | Eph            | Pse   | Eph         | Pse  | Sudafed   |             |
| Experiment                                         | Hahn echo   |       | Quad. echo     |       | Bloch decay |      | Hahn echo | Bloch decay |
| Time domain size                                   | 1024        |       | 2048           |       | 4096        |      | 2048      | 1024        |
| Dwell time ( $\mu\text{s}$ )                       | 10          | 3.33  | 5.0            |       | 10          |      | 5.0       | 11          |
| Acquisition time (ms)                              | 1.02        | 3.41  | 10.24          |       | 4.10        |      | 10.24     | 11.26       |
| Spectral width (kHz)                               | 50          | 150   | 100            |       | 50          |      | 100       | 45.454      |
| Number of scans                                    | 8192        | 19580 | 6144           | 14336 | 4096        |      | 32768     |             |
| Recycle delay (s)                                  | 0.5         | 0.75  | 5.0            |       | 2.0         |      | 0.75      |             |
| Spinning rate (kHz)                                | n/a         |       | n/a            |       | 5.0         | 10.0 | n/a       |             |
| $\pi/2$ CT selective pulse width ( $\mu\text{s}$ ) | 14.3        | 4.8   | 2.0            |       | 2.0         |      | 2.5       |             |
| $^1\text{H}$ decoupling field (kHz)                | 30          |       | 60             |       | 60          |      | 50        |             |
| Total experiment time (min)                        | 68          | 245   | 512            | 1195  | 136         |      | 421       |             |

**Table S3.** Crystallographic information for Eph and Pse.

|                  | Space Group                                                        | <i>a</i> (Å) | <i>b</i> (Å) | <i>c</i> (Å) | $\alpha$ (°) | $\beta$ (°) | $\gamma$ (°) | Volume(Å <sup>3</sup> ) | <i>Z</i> | <i>Z'</i> |
|------------------|--------------------------------------------------------------------|--------------|--------------|--------------|--------------|-------------|--------------|-------------------------|----------|-----------|
| Eph <sup>a</sup> | <i>P2</i> <sub>1</sub>                                             | 7.2557       | 6.1228       | 12.5486      | 90.00        | 102.223     | 90.00        | 544.837                 | 2        | 1         |
| Pse <sup>a</sup> | <i>P2</i> <sub>1</sub> <i>2</i> <sub>1</sub> <i>2</i> <sub>1</sub> | 25.358       | 6.428        | 6.901        | 90.00        | 90.00       | 90.00        | 1124.871                | 4        | 1         |

<sup>a</sup> CSD reference codes for crystal structures Eph (EPHECL02), and Pse (PEPHCL).

**Table S4.** Experimental  $^{13}\text{C}$  isotropic chemical shifts.

|     |      | C <sub>1</sub> (ppm) | C <sub>2</sub> (ppm) | C <sub>3</sub> (ppm) | C <sub>4</sub> (ppm) | C <sub>5</sub> (ppm) |
|-----|------|----------------------|----------------------|----------------------|----------------------|----------------------|
| Eph | Exp. | 7.2(5)               | 34.2(6)              | 63.7(9)              | 73.0(8)              | 140.2(4)             |
| Pse | Exp. | 13.1(5)              | 34.1(6)              | 63.0(9)              | 77.0(6)              | 140.4(5)             |

**Table S5.** Hirshfeld charges from the QNMRX-CSP charge database.

| Atomic Position <sup>a</sup> | Eph <sup>b</sup> | Pse <sup>b</sup> | Database <sup>c</sup> | Modified <sup>d</sup> |
|------------------------------|------------------|------------------|-----------------------|-----------------------|
| C1                           | -0.120           | -0.120           | -0.130                | -0.130                |
| C2                           | -0.050           | -0.050           | -0.130                | -0.130                |
| C3                           | 0.040            | 0.040            | -0.120                | -0.120                |
| C4                           | 0.030            | 0.040            | -0.120                | -0.120                |
| C5                           | 0.000            | 0.000            | 0.027                 | <b>0.030</b>          |
| C6                           | -0.04            | -0.040           | -0.048                | <b>-0.040</b>         |
| C7                           | -0.03            | -0.040           | -0.048                | <b>-0.040</b>         |
| C8                           | -0.04            | -0.040           | -0.048                | <b>-0.040</b>         |
| C9                           | -0.04            | -0.040           | -0.048                | <b>-0.040</b>         |
| C10                          | -0.05            | -0.040           | -0.048                | <b>-0.040</b>         |
| H1                           | 0.030            | 0.030            | 0.036                 | <b>0.060</b>          |
| H2                           | 0.040            | 0.030            | 0.036                 | <b>0.060</b>          |
| H3                           | 0.040            | 0.040            | 0.036                 | <b>0.060</b>          |
| H4                           | 0.040            | 0.040            | 0.036                 | <b>0.060</b>          |
| H5                           | 0.040            | 0.050            | 0.036                 | <b>0.060</b>          |
| H6                           | 0.040            | 0.050            | 0.036                 | <b>0.060</b>          |
| H7                           | 0.090            | 0.090            | 0.100                 | 0.100                 |
| H8                           | 0.100            | 0.100            | 0.100                 | 0.100                 |
| H9                           | 0.050            | 0.04             | 0.036                 | <b>0.060</b>          |
| H10                          | 0.020            | 0.03             | 0.036                 | <b>0.060</b>          |
| H11                          | 0.090            | 0.09             | 0.100                 | 0.100                 |
| H12                          | 0.04             | 0.030            | 0.036                 | <b>0.060</b>          |
| H13                          | 0.04             | 0.040            | 0.036                 | <b>0.060</b>          |
| H14                          | 0.03             | 0.040            | 0.036                 | <b>0.060</b>          |
| H15                          | 0.04             | 0.040            | 0.036                 | <b>0.060</b>          |
| H16                          | 0.03             | 0.040            | 0.036                 | <b>0.060</b>          |
| O                            | -0.180           | -0.190           | -0.157                | <b>-0.150</b>         |
| N                            | 0.010            | 0.010            | 0.010                 | 0.010                 |
| Cl                           | -0.300           | -0.320           | -0.300                | <b>-0.270</b>         |

<sup>a</sup> For labeling of atomic position see **Scheme 1**.

<sup>b</sup> Hirshfeld charges obtained from the convergent geometry optimized known crystal structure.

<sup>c</sup> Hirshfeld charges obtained from the charge database. For information on how the charge database was constructed see **Supplement 1**.

<sup>d</sup> Hirshfeld charges that were modified from the database to apply a net charge of zero. Bold terms under the modified section are provided to show which charges were modified.

**Table S6.** CSD datamine summary of the top seven space groups.

|            | $P2_1/c$ | $P\bar{1}$ | $P2_12_12_1$ | $P2_1$ | $C2/c$ | $Pbca$ | $Pna2_1$ |
|------------|----------|------------|--------------|--------|--------|--------|----------|
| Population | 1552     | 856        | 801          | 543    | 251    | 184    | 83       |
| Percentage | 32.9     | 18.2       | 17           | 11.5   | 5.3    | 3.9    | 1.8      |
| $Z$        | 4        | 2          | 4            | 2      | 8      | 8      | 4        |

**Supplement 1: Charge Database.** When QNMRX-CSP is started from a refined isolated molecule there is the need to provide a set of Hirshfeld charges, see **Scheme S1**, M1 Step 3. Therefore, in Peach *et al.* 2024,<sup>1</sup> a Charge Database was constructed by refining 43 organic HCl salts obtained from the CCDC and refining the structures using convergent geometry optimizations. The atoms of each organic HCl salt were grouped based on their functional groups and the average Hirshfeld charge for each functional group was tabulated. For the structural models used herein, we have balanced the net charges applied to our isolated molecule to be equal to zero by modifying the charges with the highest standard deviation. For our results herein, see **Table S5**.

**Supplement 2: Computational Workstations.** All calculations were run on either of two workstations both operating with a Windows 10 Pro operating system: a) The first featuring two Intel® Xeon Silver 4110 processors with a base frequency of 2.10 GHz for 8 core/16 threads, two NVIDIA® Quadro P2000 graphics cards, 192 GB of 2400 MHz RAM, and two NVMe solid-state hard drives, one KIOXIA 512 GB (reserved for OS and programs) and a SAMSUNG® 1024 GB (reserved for data storage). b) The second workstation features two Intel® Silver 4214R processors with a base frequency of 3.50 GHz for 12 cores/24 threads, two NVIDIA® T1000 graphics cards, 384 GB of 2933 MHz RAM, two NVMe solid-state hard drives, a M.2 512 GB PCIe (reserved for OS and programs) and a M.2 1024 GB PCIe (reserved for data storage).

## References

- (1) Peach, A. A.; Fleischer, C. H. I.; Levin, K.; Holmes, S. T.; Sanchez, J. E.; Schurko, R. W. Quadrupolar NMR Crystallography Guided Crystal Structure Prediction (QNMRX-CSP). *CrystEngComm* In review.
